# Supplementary material for: Luminescent and photocatalytic activity of NaGd(MoO4)2:Dy3+/Eu3+ and NaGd(WO4)2:Dy3+/Eu3+ nanorods for efficient sensing and degradation of the antibiotic drug, nitrofurantoin
Source: Royal Society of Chemistry journal article supplement (doi:10.1039/d2nj05980k), 2023-01-01
Supplement: d2nj05980k1.pdf [file d2nj05980k1.pdf]

**(Supplementary Information)**

**Luminescent and Photocatalytic Activity of NaGd(MoO<sub>4</sub>)<sub>2</sub>:Dy<sup>3+</sup>/Eu<sup>3+</sup> and NaGd(WO<sub>4</sub>)<sub>2</sub>:Dy<sup>3+</sup>/Eu<sup>3+</sup> Nanorods for Efficient Sensing and Degradation of Antibiotic Drug; Nitrofurantoin**

Swaita Devi,<sup>a</sup> Richa Singhaal,<sup>a</sup> Charanjeet Sen,<sup>a</sup> Haq Nawaz Sheikh,<sup>a,\*</sup>

<sup>a</sup>Department of Chemistry, University of Jammu, Baba Sahib Ambedkar Road, Jammu 180006, India

[hnsheikh@rediffmail.com](mailto:hnsheikh@rediffmail.com)

**Table of Contents**

| <b>CONTENTS</b>                                                                                                                                                                                                                                                        | <b>Pages</b> |
|------------------------------------------------------------------------------------------------------------------------------------------------------------------------------------------------------------------------------------------------------------------------|--------------|
| 1. TEM micrographs.....                                                                                                                                                                                                                                                | <b>S2</b>    |
| 2. EDS spectra.....                                                                                                                                                                                                                                                    | <b>S3</b>    |
| 3. FT-IR spectra .....                                                                                                                                                                                                                                                 | <b>S4-S5</b> |
| 4. Photoluminescence emission spectra of NaGd(MoO <sub>4</sub> ) <sub>2</sub> :Dy <sup>3+</sup> displaying different emissions at varying Dy <sup>3+</sup> ion content: (a) 3%, (b) 5%, (c) 7% and (d) NaGd(WO <sub>4</sub> ) <sub>2</sub> :Dy <sup>3+</sup> (5%)..... | <b>S6</b>    |
| 5. Life time decay curves of prepared nanorods.....                                                                                                                                                                                                                    | <b>S7</b>    |
| 6. Energy transfer diagram.....                                                                                                                                                                                                                                        | <b>S8</b>    |
| 7. UV-visible spectra.....                                                                                                                                                                                                                                             | <b>S9</b>    |
| 8. Life time decay curves of NaGd(MoO <sub>4</sub> ) <sub>2</sub> :Dy <sup>3+</sup> /Eu <sup>3+</sup> (7% Eu <sup>3+</sup> ) in the presence of different concentrations of NFT.....                                                                                   | <b>S10</b>   |
| 9. Pseudo-first order plots of different catalysts for photodegradation of NFT...S11                                                                                                                                                                                   |              |

10. Effect of different amount of  $\text{NaGd}(\text{WO}_4)_2:\text{Dy}^{3+}/\text{Eu}^{3+}$  catalyst and Initial NFT concentration on the photodegradation of NFT.....S12

11. Impact of different scavengers on the photodegradation of NFT.....S12

12. FE-SEM image of  $\text{NaGd}(\text{WO}_4)_2:\text{Dy}^{3+}/\text{Eu}^{3+}$  after photodegradation of NFT....S13

13. EDS spectrum of  $\text{NaGd}(\text{WO}_4)_2:\text{Dy}^{3+}/\text{Eu}^{3+}$  after photodegradation of NFT.....S14

14. PXRD spectrum of  $\text{NaGd}(\text{WO}_4)_2:\text{Dy}^{3+}/\text{Eu}^{3+}$  after photodegradation of NFT...S15

15. EDS data Tables.....S16-S17

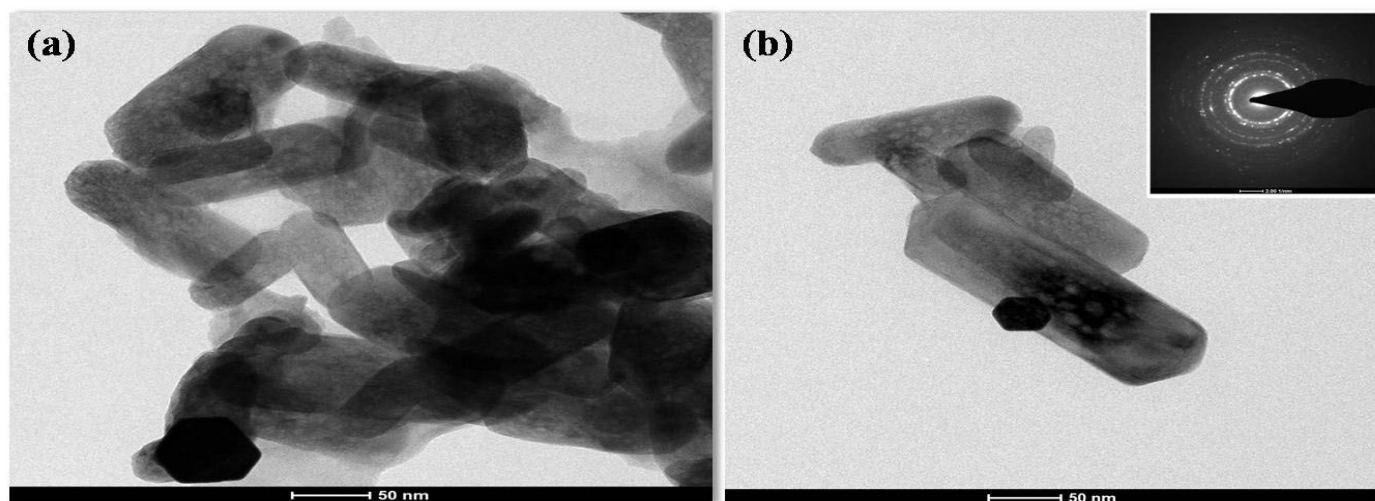

**Fig. S1** TEM micrographs of (a)  $\text{NaGd}(\text{MoO}_4)_2$  and (b)  $\text{NaGd}(\text{MoO}_4)_2:\text{Dy}^{3+}/\text{Eu}^{3+}$  (7%  $\text{Eu}^{3+}$ ) nanorods prepared at 200 °C.

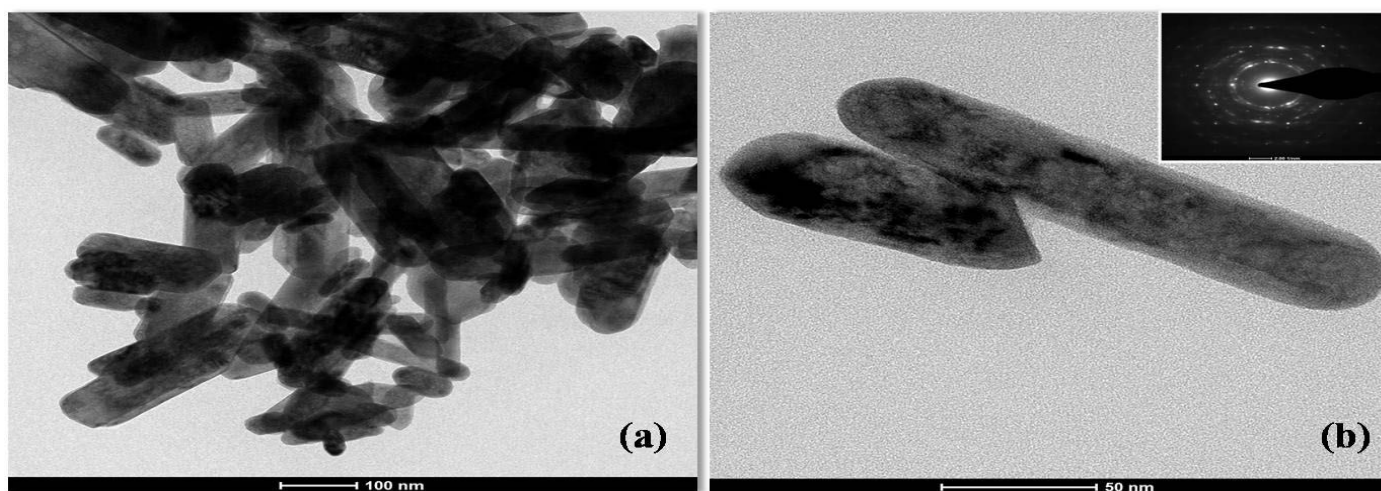

**Fig. S2** TEM micrographs of (a)  $\text{NaGd}(\text{WO}_4)_2$  and (b)  $\text{NaGd}(\text{WO}_4)_2:\text{Dy}^{3+}/\text{Eu}^{3+}$  nanorods prepared at 200 °C.

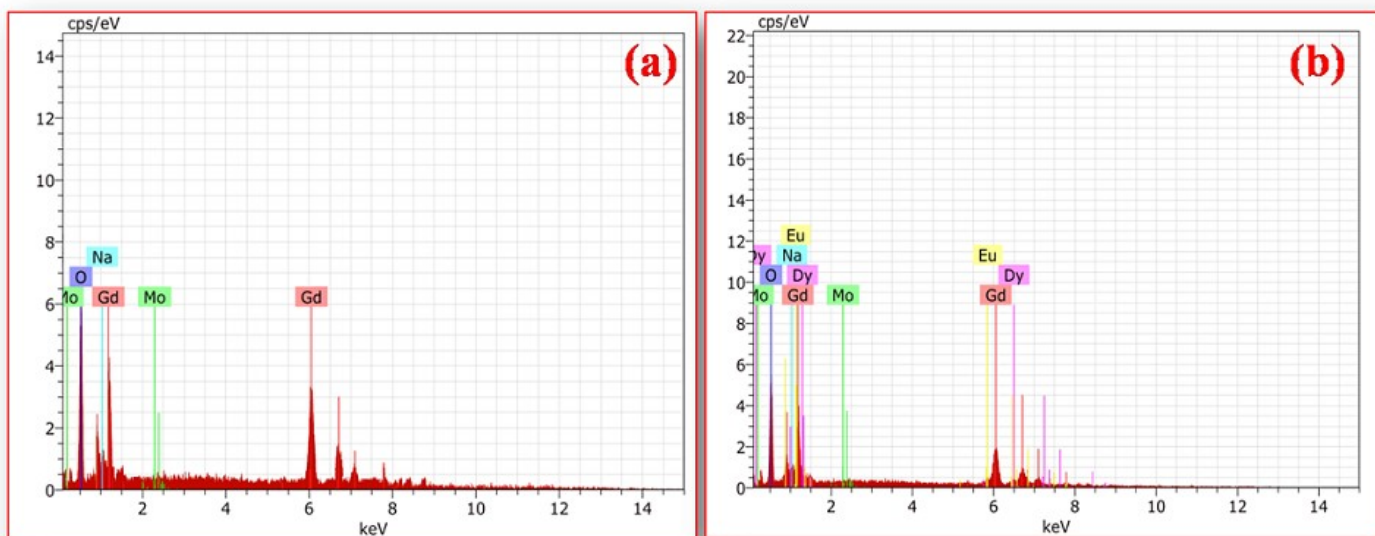

**Fig. S3** EDS spectra of (a) NaGd(MoO<sub>4</sub>)<sub>2</sub> and (b) NaGd(MoO<sub>4</sub>)<sub>2</sub>:Dy<sup>3+</sup>/Eu<sup>3+</sup> (7% Eu<sup>3+</sup>) nanorods prepared at 200 °C.

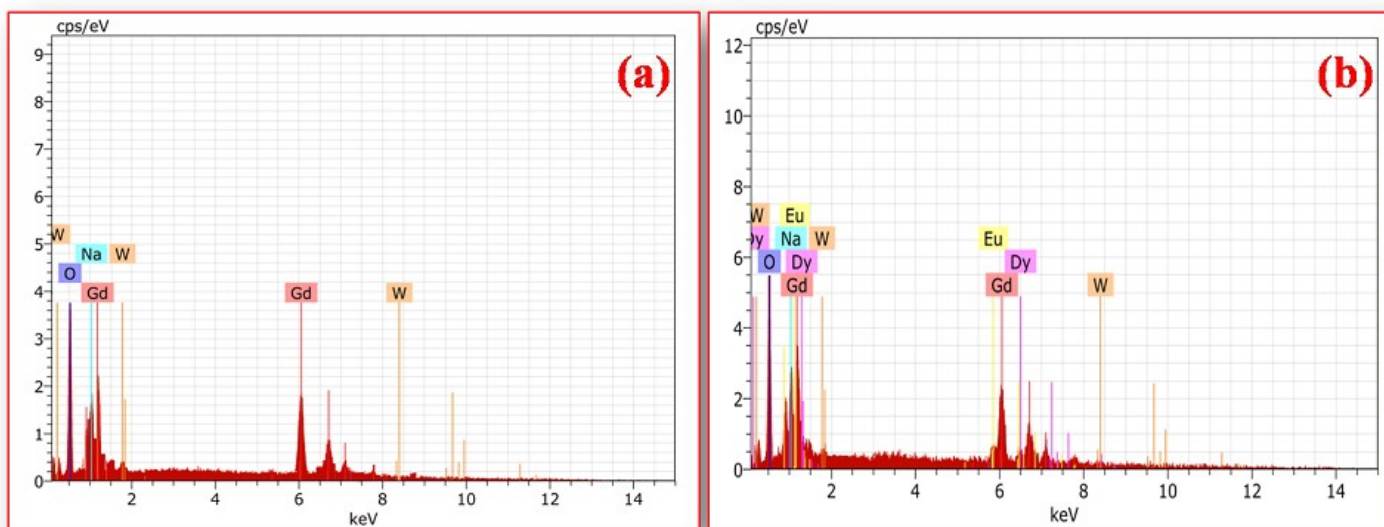

**Fig. S4** EDS spectra of (a) NaGd(WO<sub>4</sub>)<sub>2</sub> and (b) NaGd(WO<sub>4</sub>)<sub>2</sub>:Dy<sup>3+</sup>/Eu<sup>3+</sup> (7% Eu<sup>3+</sup>) nanorods prepared at 200 °C.

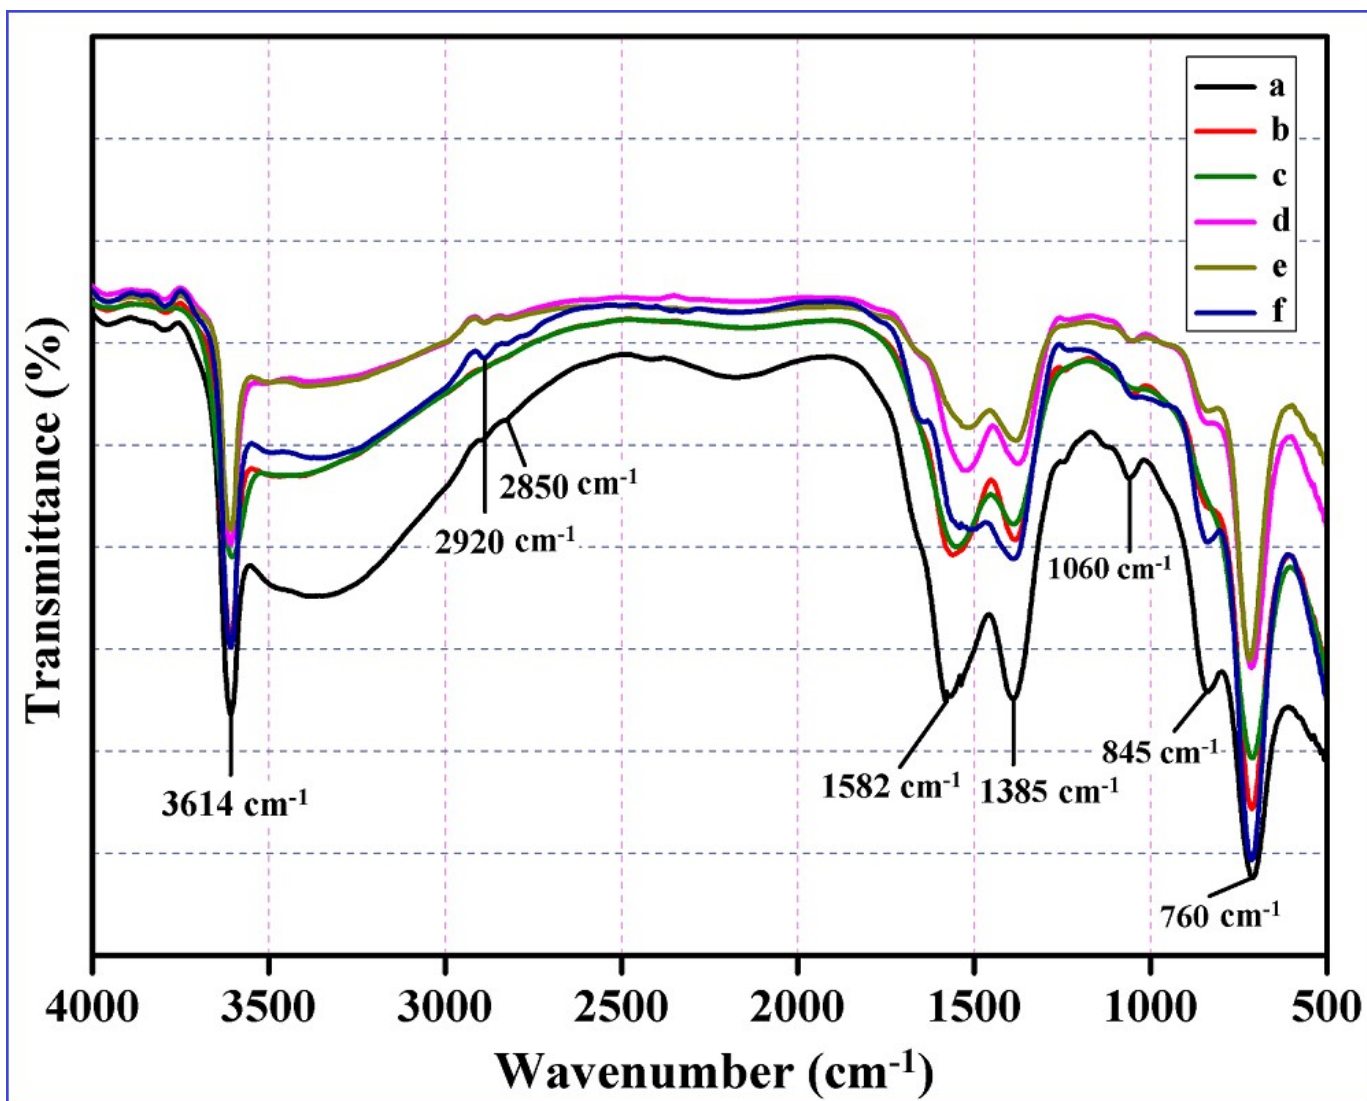

**Fig. S5** FT-IR spectra of NaGd(MoO<sub>4</sub>)<sub>2</sub> synthesized at different temperatures (a) 140 (b) 160 (c) 180 (d) 200 and (e) 220 °C and (f) NaGd(MoO<sub>4</sub>)<sub>2</sub>:Dy<sup>3+</sup>/Eu<sup>3+</sup> (7% Eu<sup>3+</sup>, 200 °C).

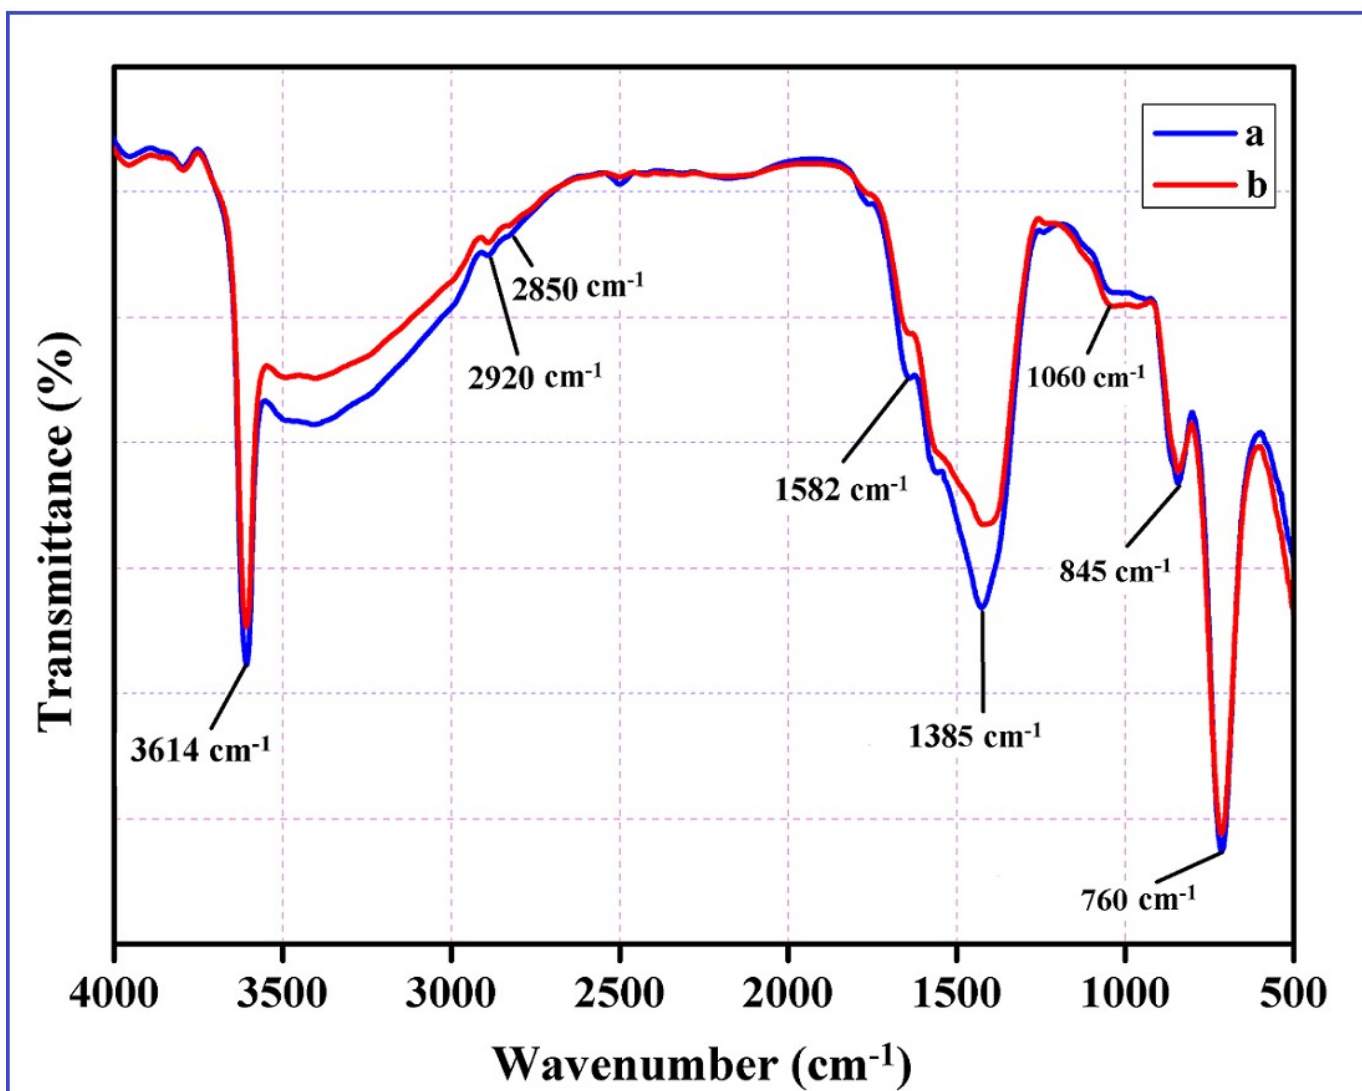

Fig. S6 FT-IR spectra of (a) NaGd(WO<sub>4</sub>)<sub>2</sub> and (b) NaGd(WO<sub>4</sub>)<sub>2</sub>:Dy<sup>3+</sup>/Eu<sup>3+</sup> (7% Eu<sup>3+</sup>) synthesized at 200 °C.

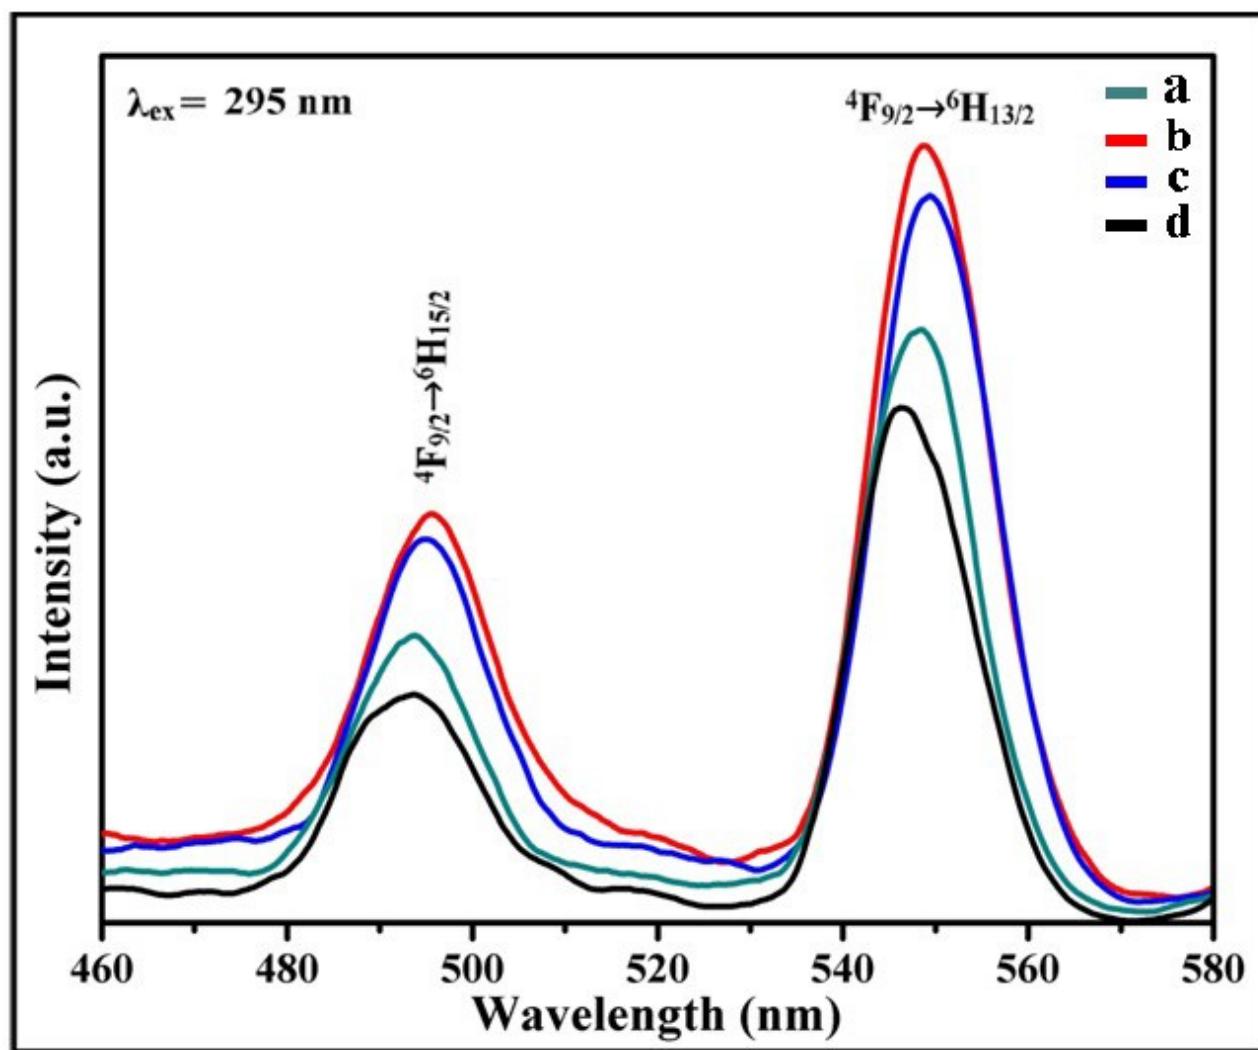

**Fig. S7** Photoluminescence emission spectra of  $\text{NaGd}(\text{MoO}_4)_2:\text{Dy}^{3+}$  displaying different emissions at varying  $\text{Dy}^{3+}$  ion content: (a) 3%, (b) 5%, (c) 7% and (d)  $\text{NaGd}(\text{WO}_4)_2:\text{Dy}^{3+}$  (5%)



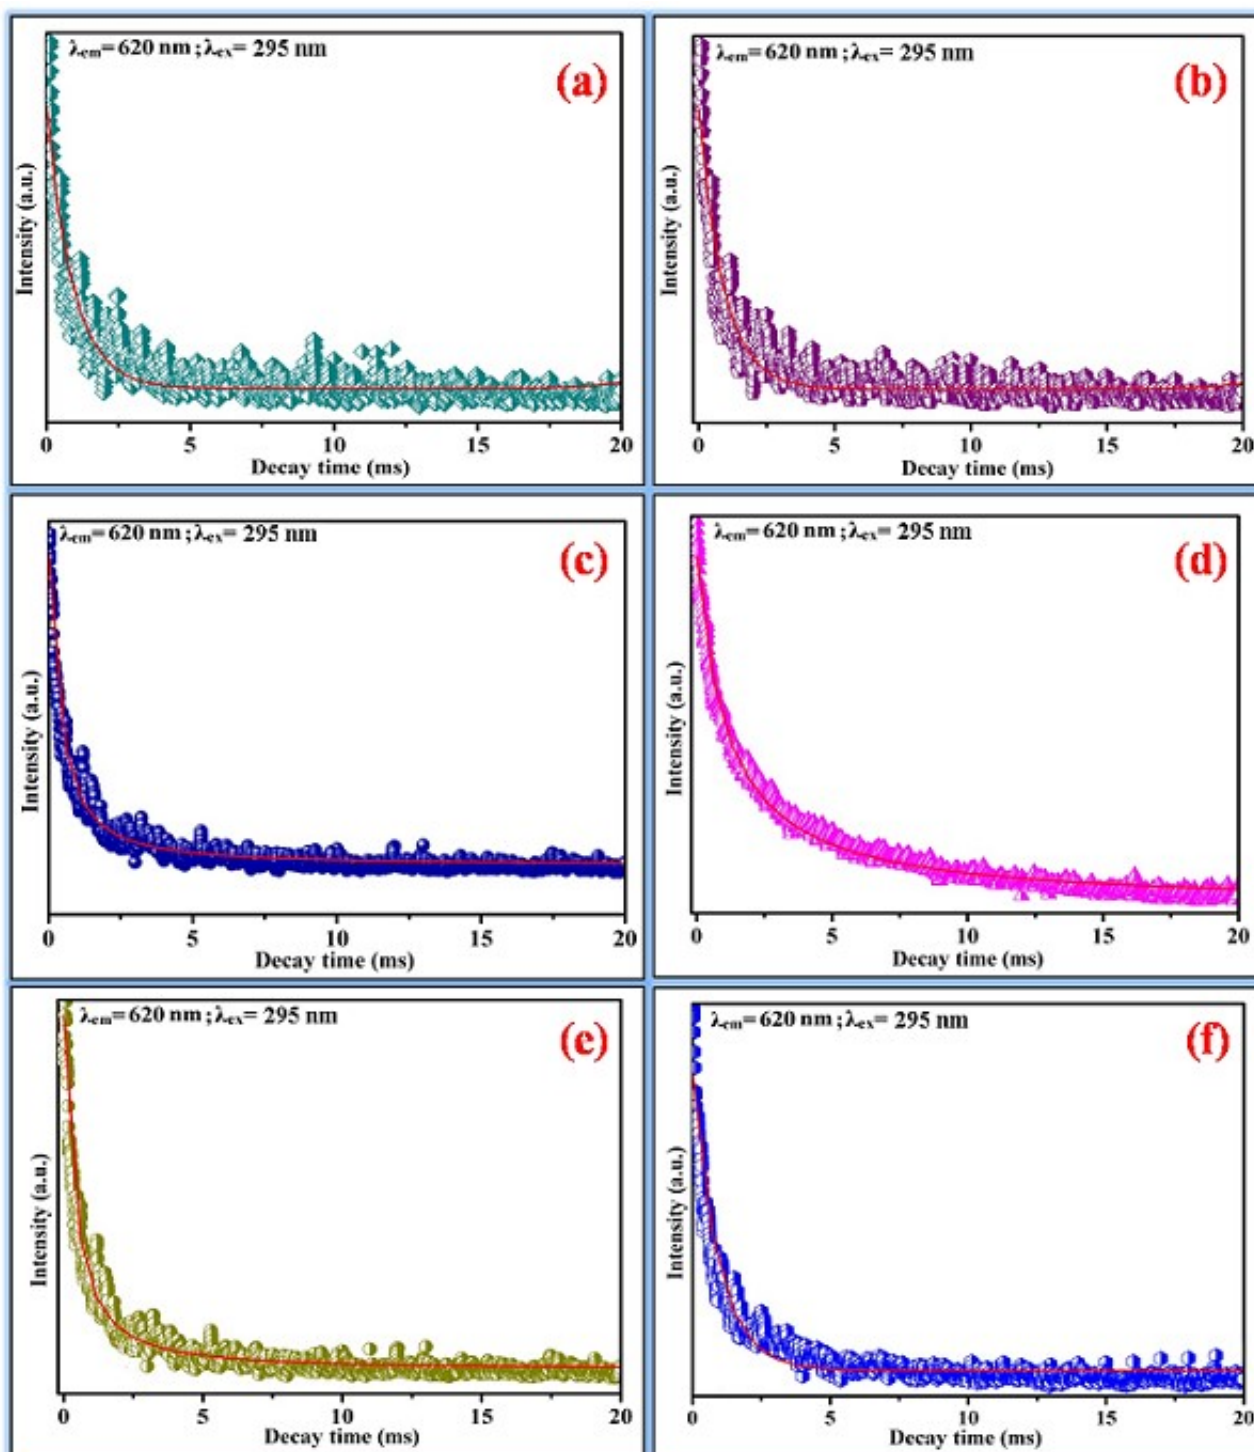

**Fig. S8** Decay curves of  $\text{NaGd}(\text{MoO}_4)_2:\text{Dy}^{3+}/\text{Eu}^{3+}$  nanorods with different  $\text{Eu}^{3+}$  ion content: (a) 1%, (b) 3, (c) 5%, (d) 7%, (e) 9% and (f)  $\text{NaGd}(\text{WO}_4)_2:\text{Dy}^{3+}/\text{Eu}^{3+}$  (7%  $\text{Eu}^{3+}$ ).

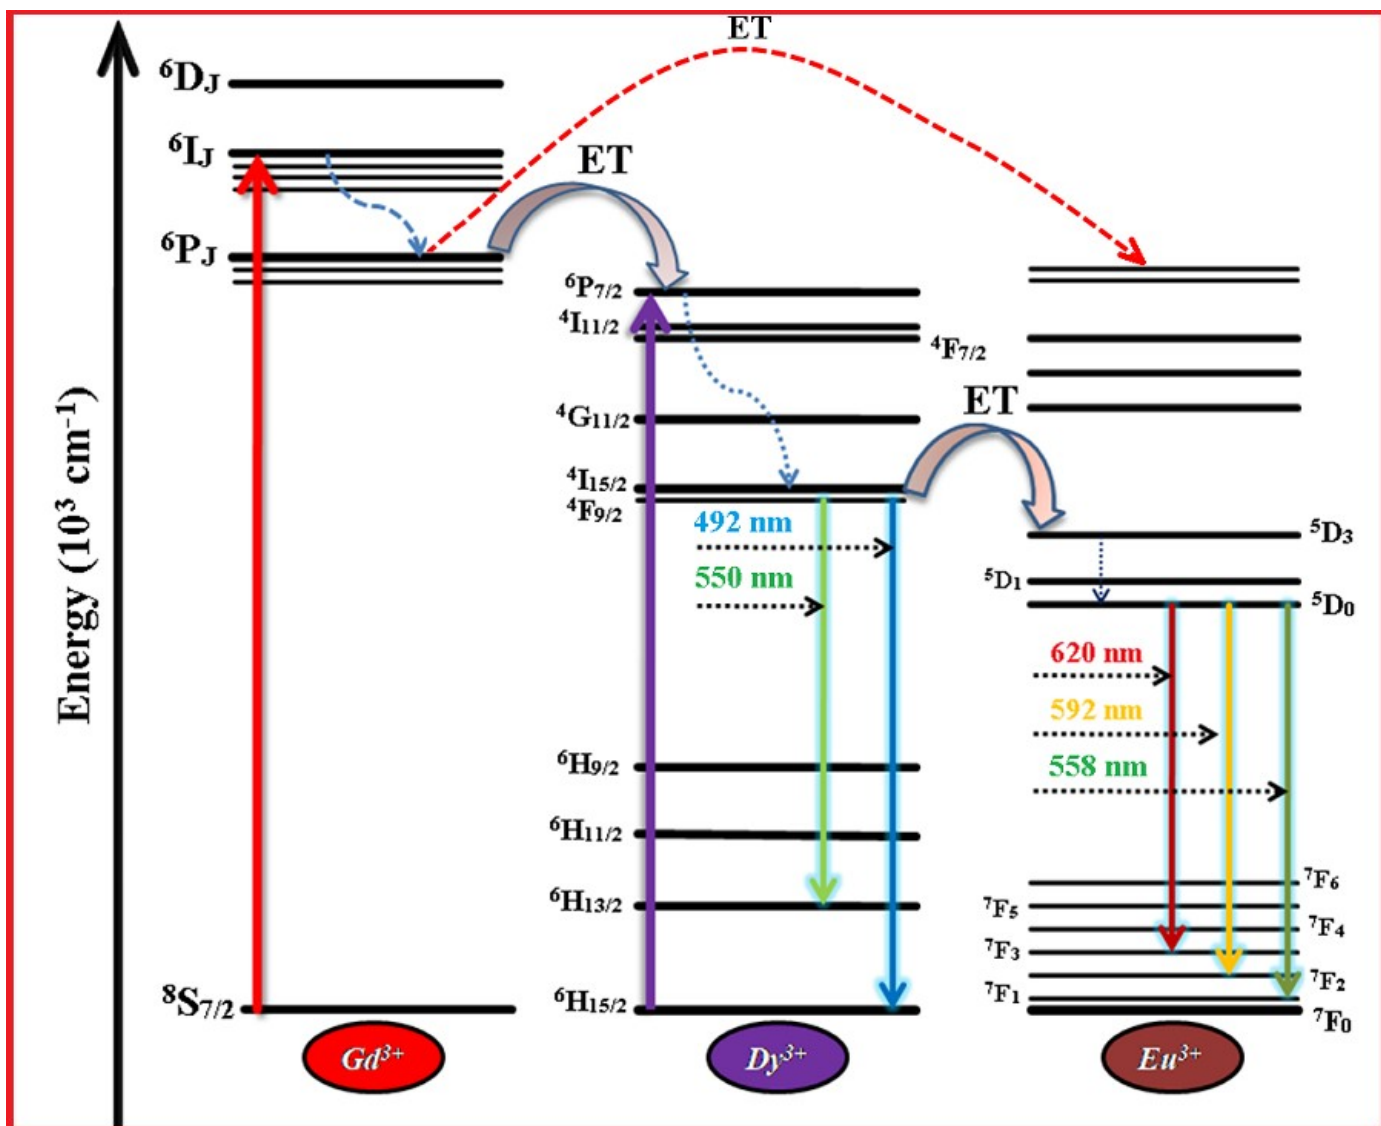

Fig. S9 The plausible energy transfer mechanism between  $Gd^{3+}$ ,  $Dy^{3+}$  and  $Eu^{3+}$  ions.



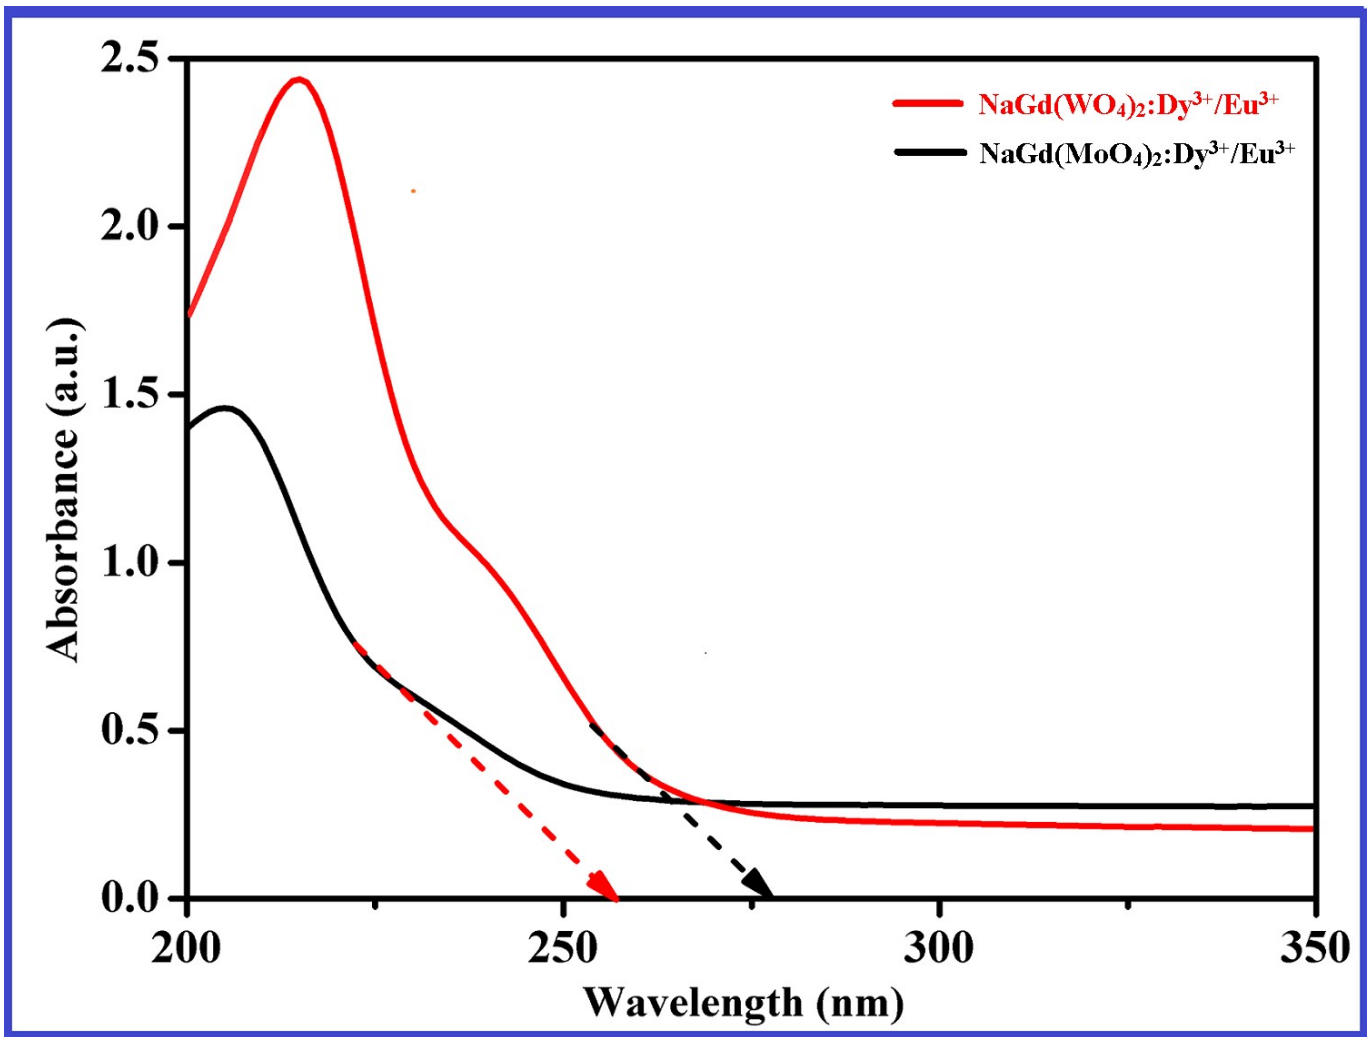

Fig. S10 UV-visible absorption spectra of  $\text{NaGd}(\text{WO}_4)_2:\text{Dy}^{3+}/\text{Eu}^{3+}$  and  $\text{NaGd}(\text{MoO}_4)_2:\text{Dy}^{3+}/\text{Eu}^{3+}$  nanorods.

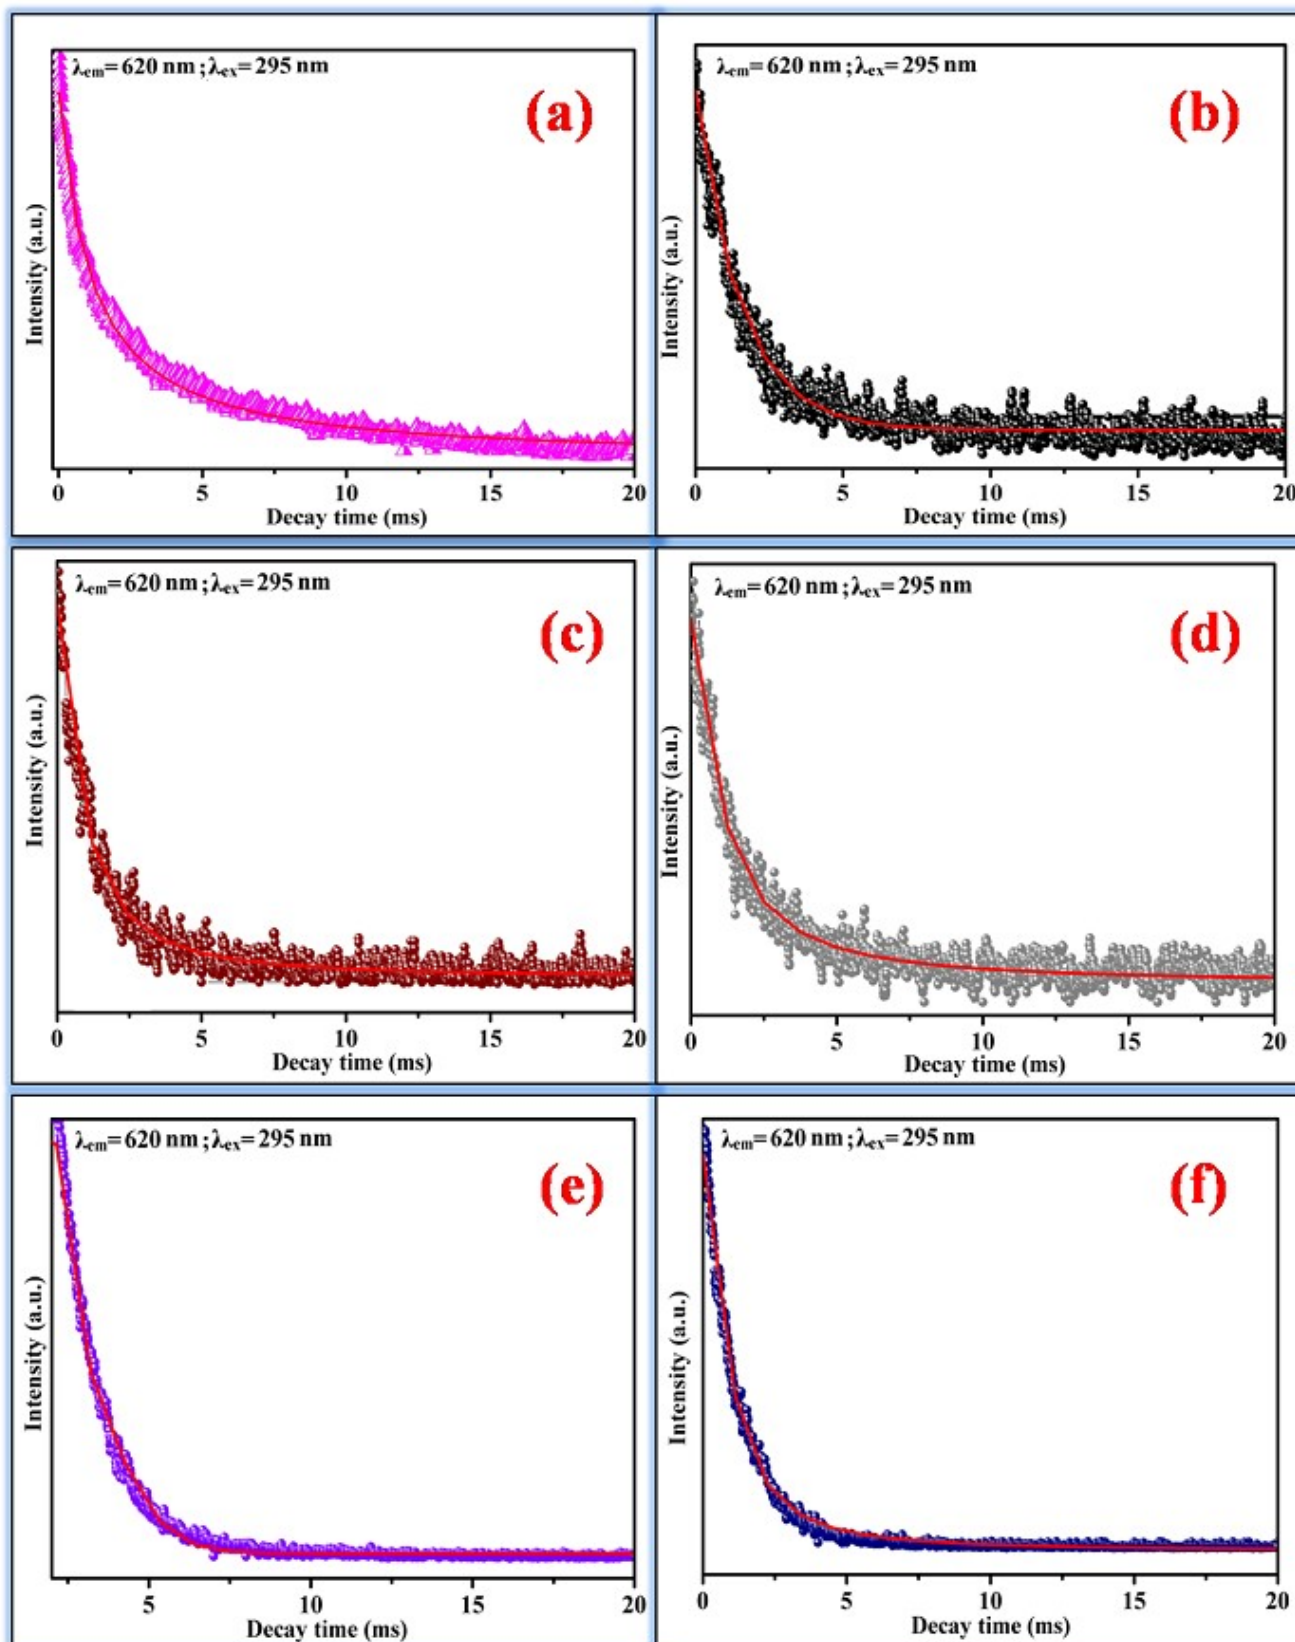

**Fig. S11** Time-resolved decay dynamics of  $\text{NaGd}(\text{MoO}_4)_2:\text{Dy}^{3+}/\text{Eu}^{3+}$  after excitation at 295 nm in the presence of NFT (0, 20, 40, 60, 80 and 100 ppm).

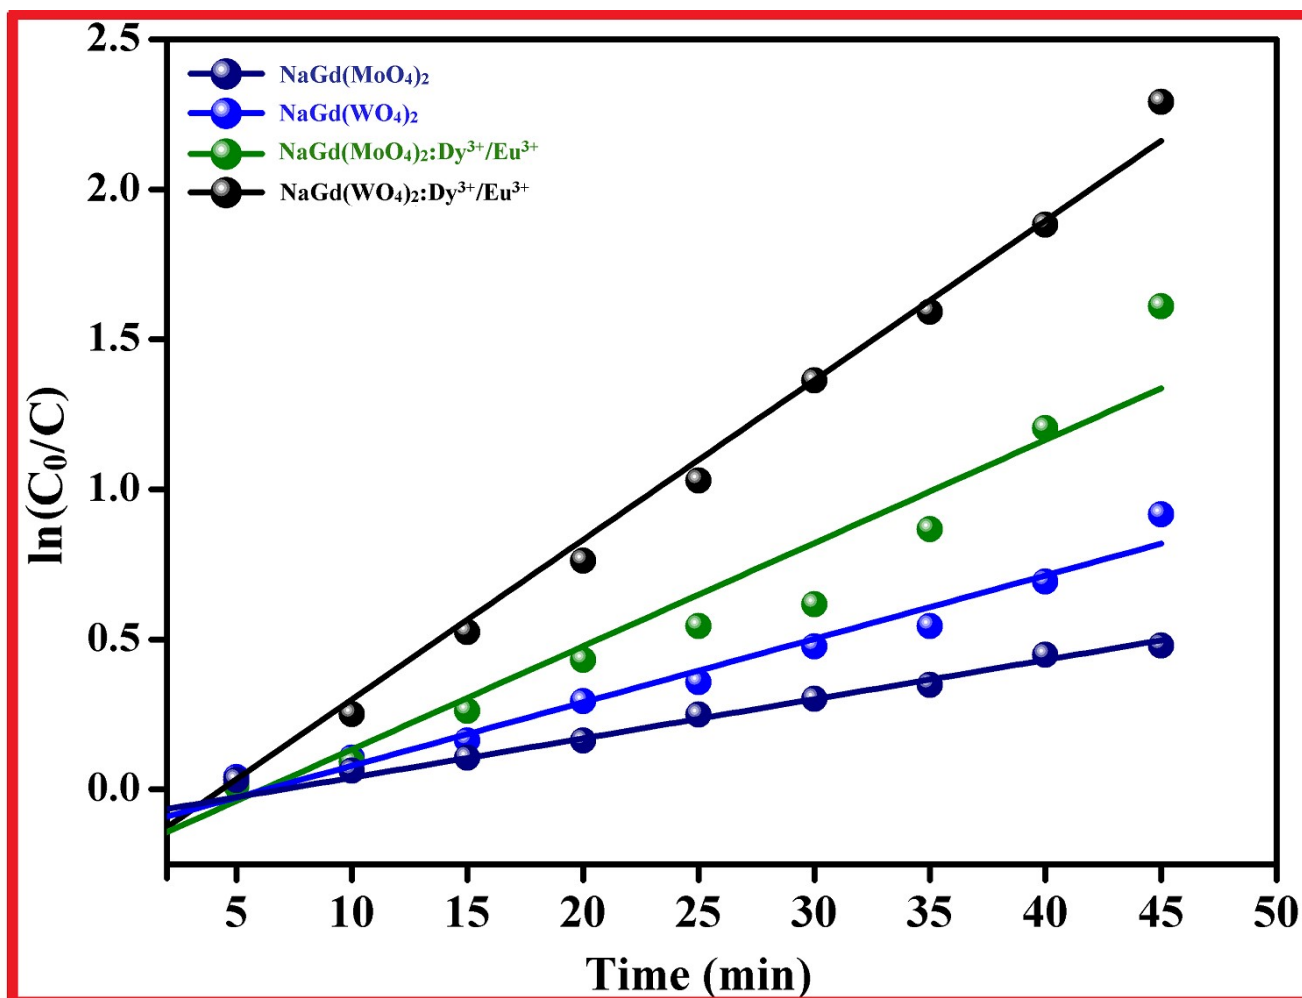

**Fig. S12** Pseudo-first order plots of photodegradation of NFT by NaGd(MoO<sub>4</sub>)<sub>2</sub>, NaGd(WO<sub>4</sub>)<sub>2</sub>, NaGd(MoO<sub>4</sub>)<sub>2</sub>:Dy<sup>3+</sup>/Eu<sup>3+</sup> and NaGd(WO<sub>4</sub>)<sub>2</sub>:Dy<sup>3+</sup>/Eu<sup>3+</sup> nanocatalysts under UV light irradiation.

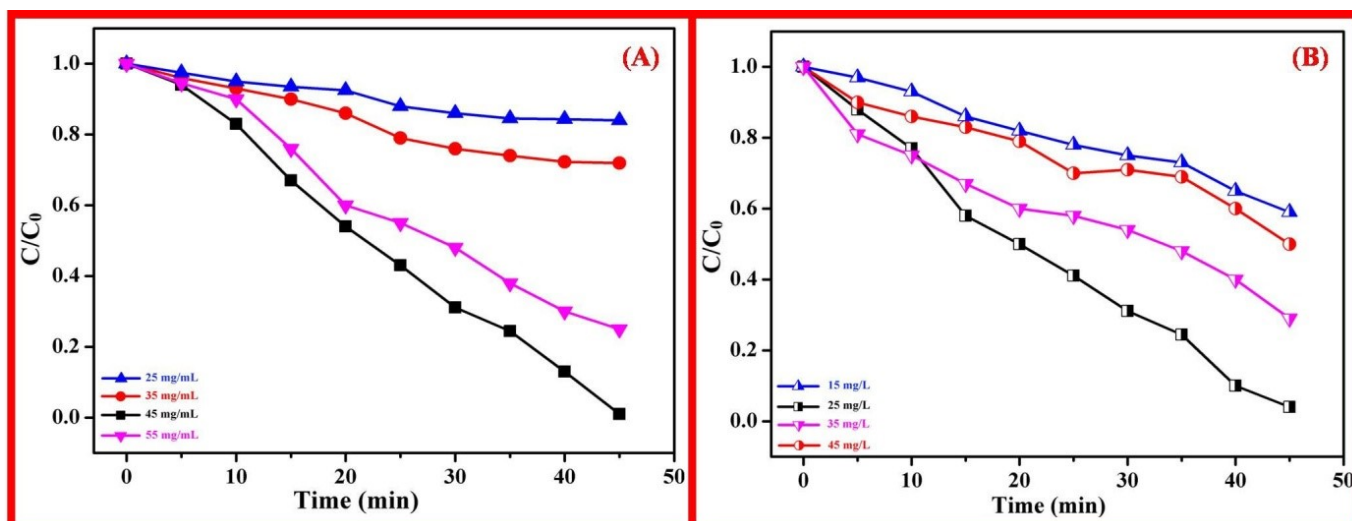

**Fig. S13** (A) Effect of different amount of  $\text{NaGd}(\text{WO}_4)_2\text{Dy}^{3+}/\text{Eu}^{3+}$  catalyst and (B) Initial NFT concentration on the photodegradation of NFT.

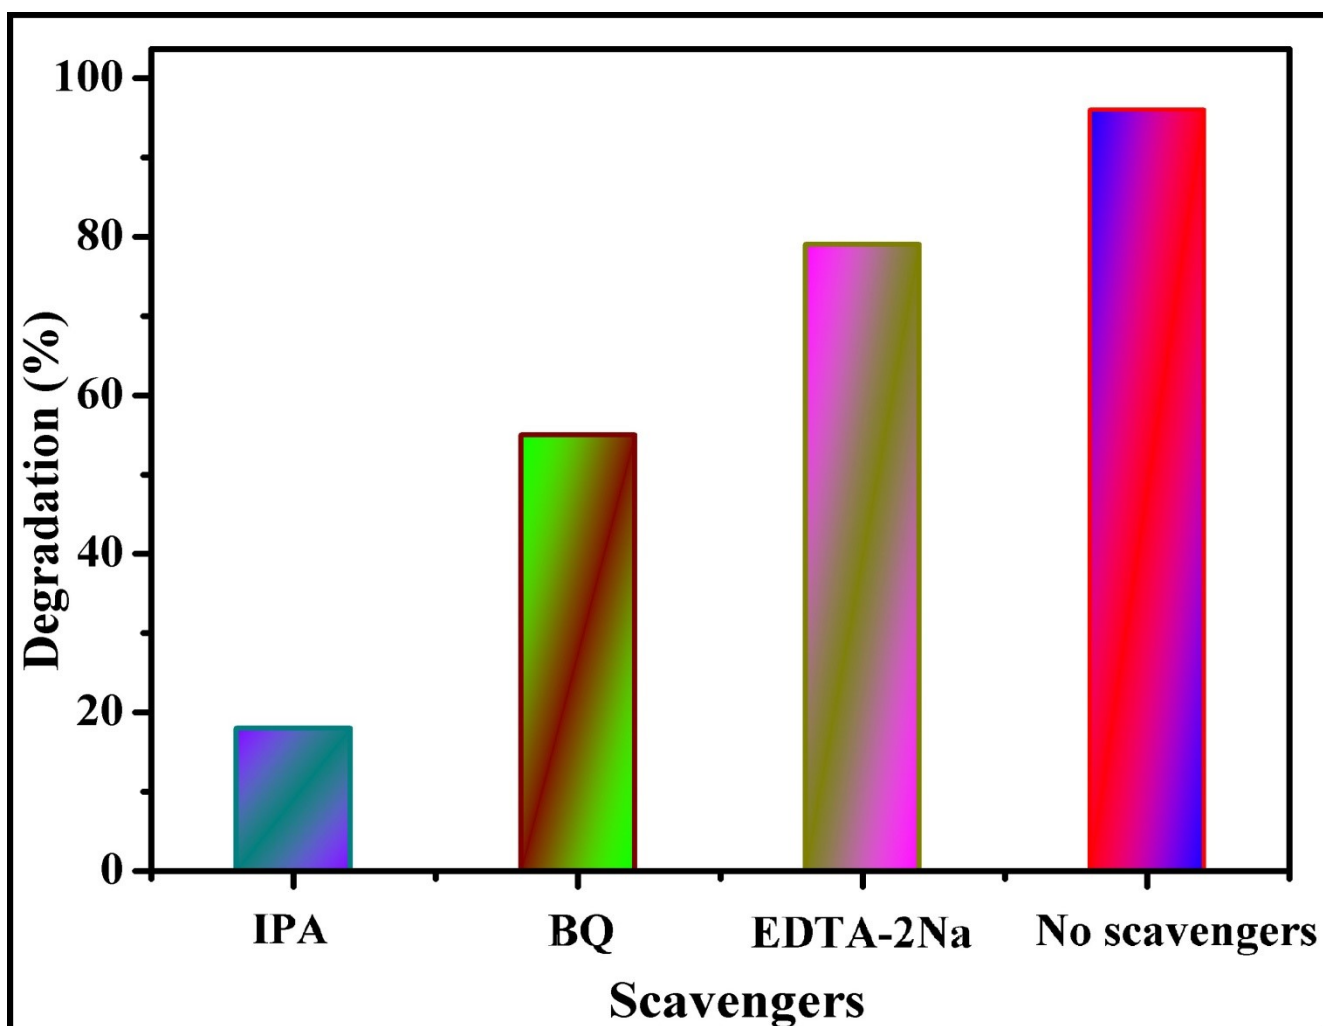

**Fig. S14** Impact of different scavengers on the photodegradation of NFT.

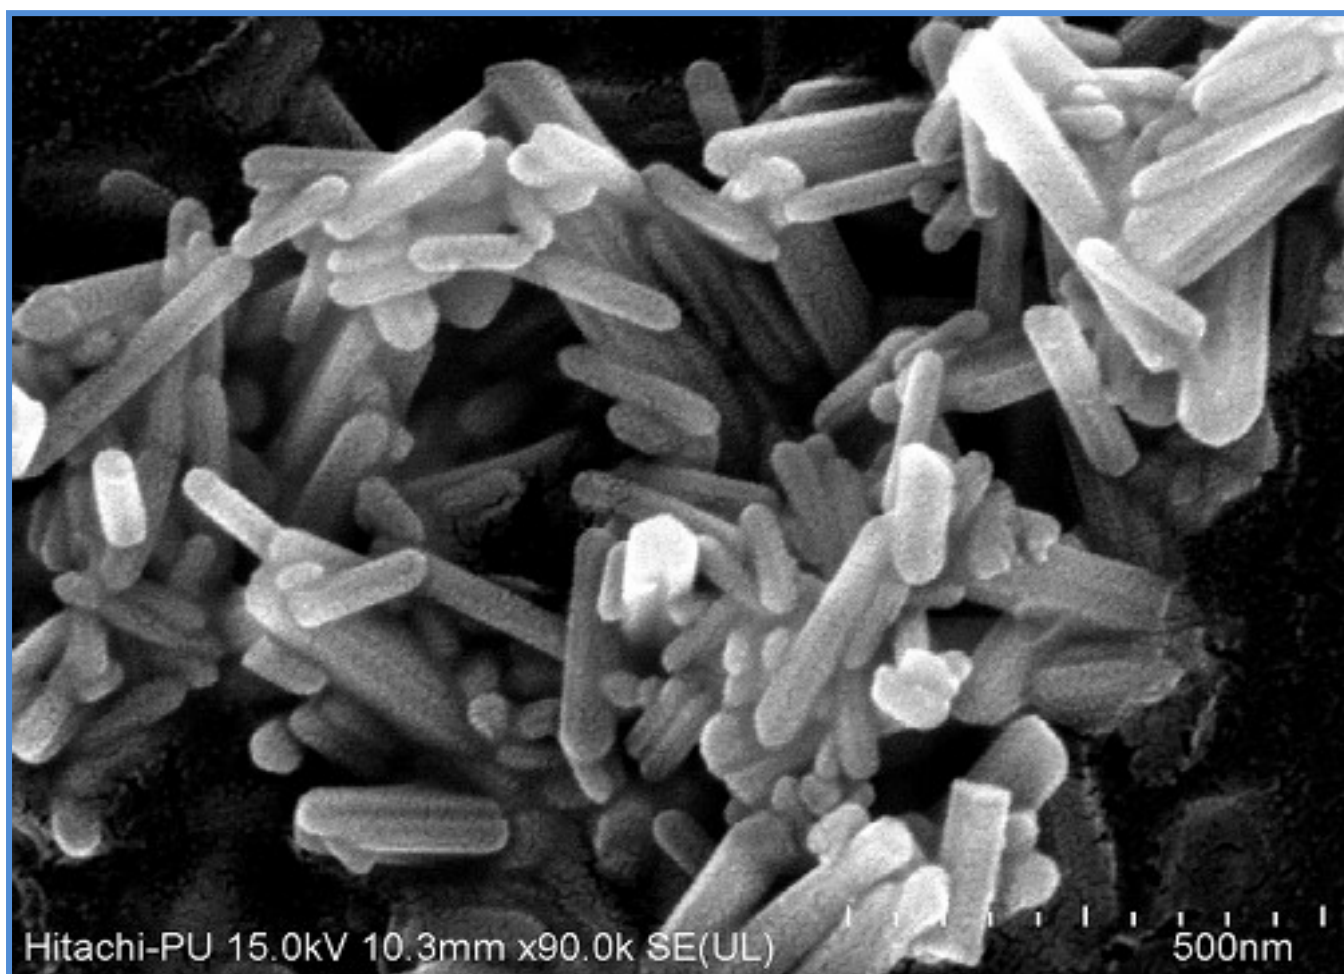

**Fig. S15** FE-SEM micrograph of  $\text{NaGd}(\text{WO}_4)_2:\text{Dy}^{3+}/\text{Eu}^{3+}$  after photodegradation of NFT.

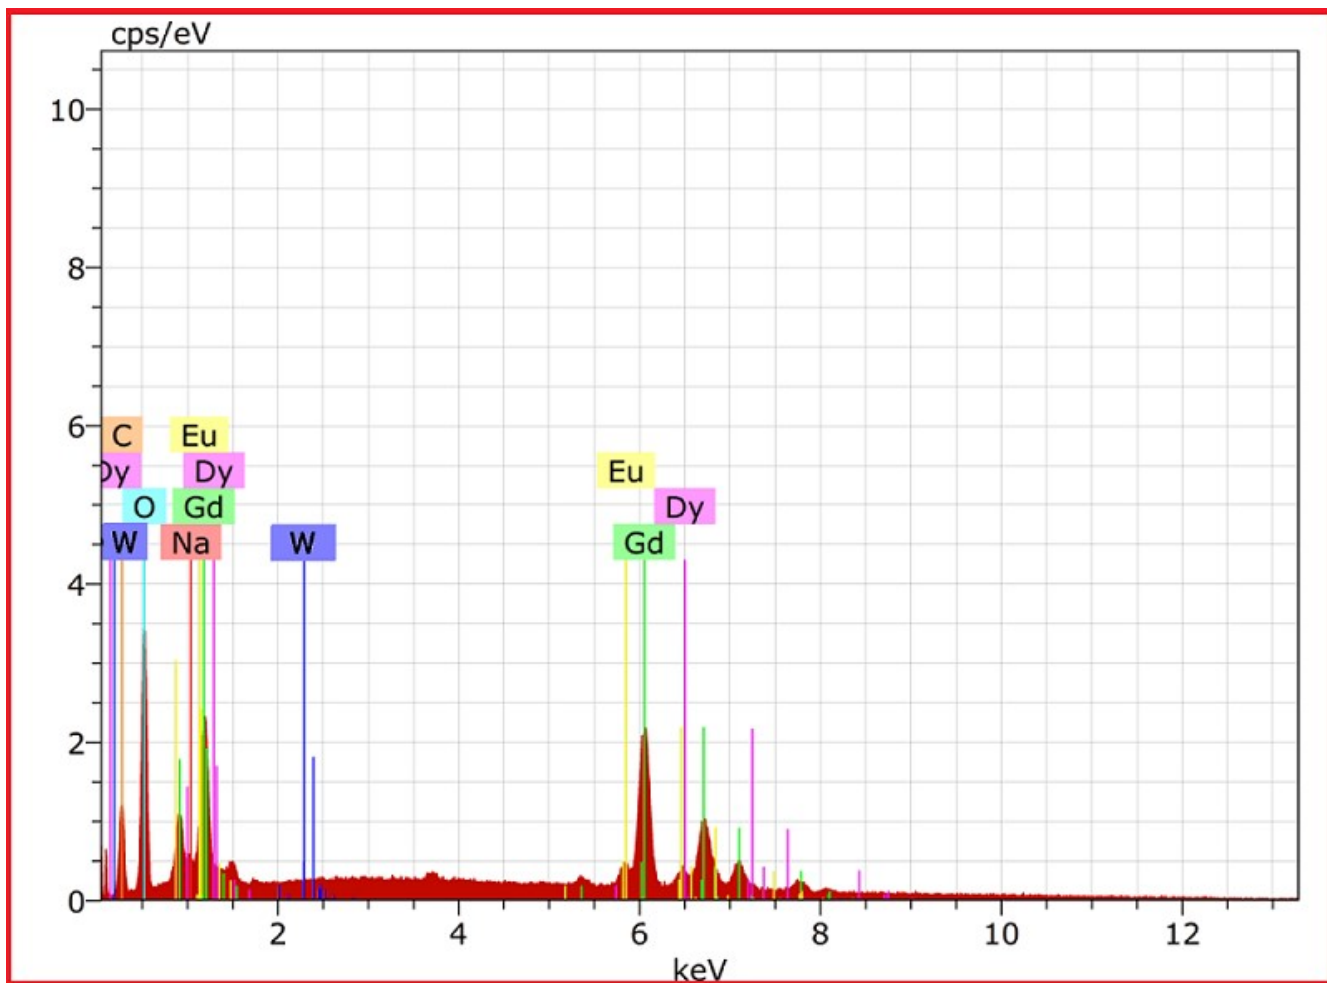

**Fig. S16** EDS spectrum of  $\text{NaGd}(\text{WO}_4)_2:\text{Dy}^{3+}/\text{Eu}^{3+}$  after photodegradation of NFT.



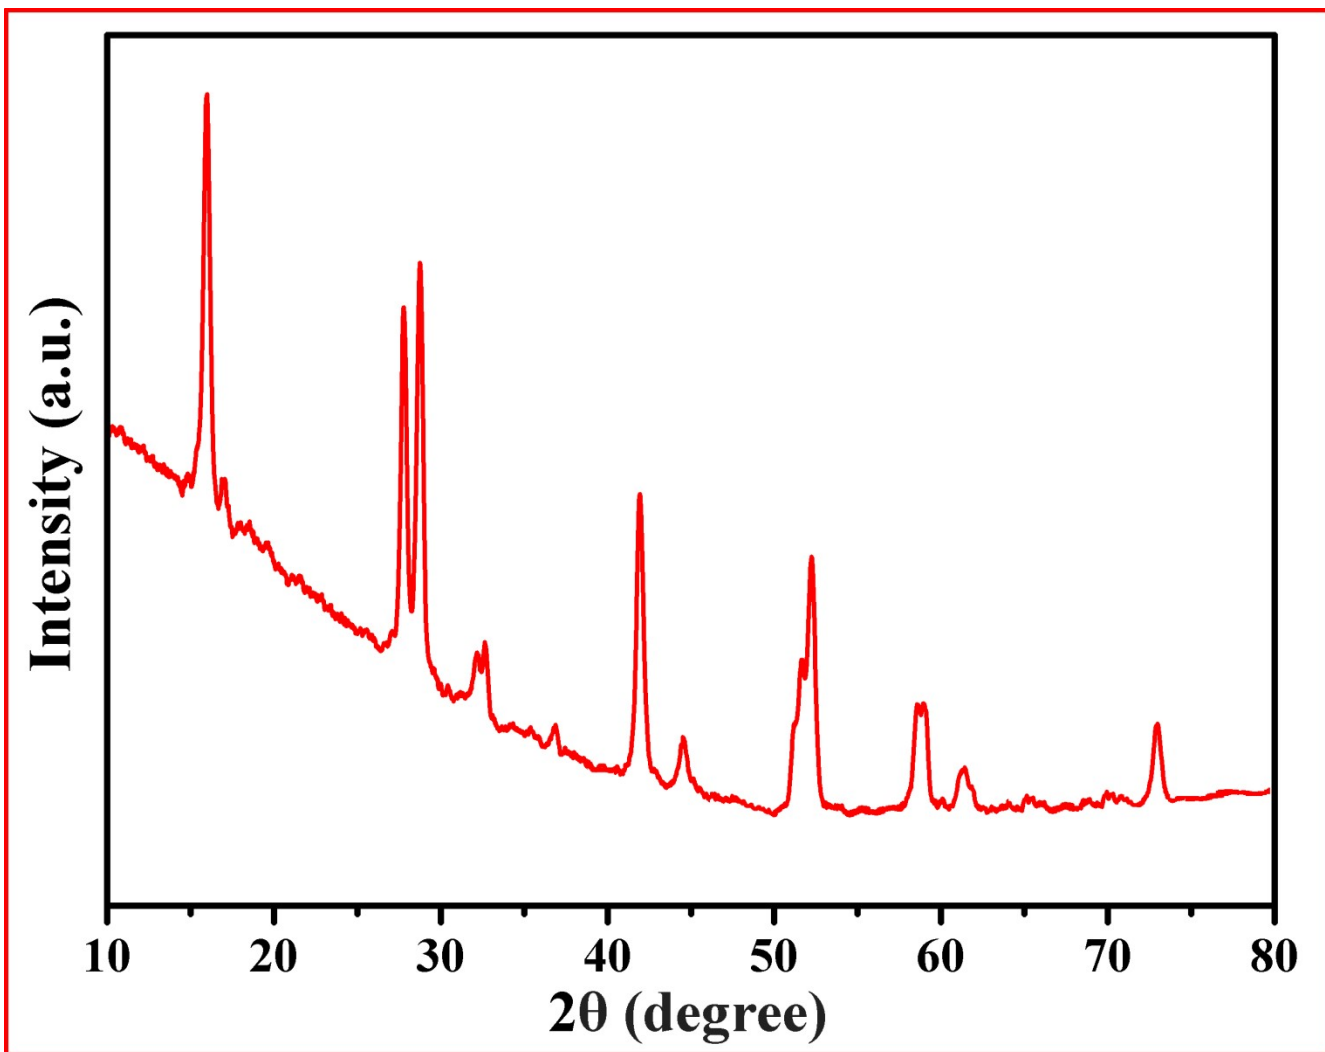

Fig. S17 PXRd spectrum of  $\text{NaGd}(\text{WO}_4)_2:\text{Dy}^{3+}/\text{Eu}^{3+}$  after photodegradation of NFT.

**Table S1** Atomic and Weight % of elements present in NaGd(MoO<sub>4</sub>)<sub>2</sub> and NaGd(MoO<sub>4</sub>)<sub>2</sub>:Dy<sup>3+</sup>/Eu<sup>3+</sup> nanorods prepared at 200 °C

| <b>Elements</b>   | <b>NaGd(MoO<sub>4</sub>)<sub>2</sub></b> |       | <b>NaGd(MoO<sub>4</sub>)<sub>2</sub>:Dy<sup>3+</sup>/Eu<sup>3+</sup></b> |       |
|-------------------|------------------------------------------|-------|--------------------------------------------------------------------------|-------|
|                   | Wt %                                     | At %  | Wt %                                                                     | At %  |
| <b>Sodium</b>     | 0.85                                     | 1.74  | 1.99                                                                     | 2.27  |
| <b>Gadolinium</b> | 73.28                                    | 27.33 | 62.14                                                                    | 20.85 |
| <b>Molybdenum</b> | 5.25                                     | 1.68  | 2.65                                                                     | 0.78  |
| <b>Oxygen</b>     | 24.31                                    | 68.58 | 21.80                                                                    | 71.90 |
| <b>Dysprosium</b> | -                                        | -     | 4.85                                                                     | 1.57  |
| <b>Europium</b>   | -                                        | -     | 7.57                                                                     | 2.63  |

**Table S2** Atomic and Weight % of elements present in NaGd(WO<sub>4</sub>)<sub>2</sub> and NaGd(WO<sub>4</sub>)<sub>2</sub>:Dy<sup>3+</sup>/Eu<sup>3+</sup> nanorods prepared at 200 °C

| <b>Elements</b>   | <b>NaGd(WO<sub>4</sub>)<sub>2</sub></b> |       | <b>NaGd(WO<sub>4</sub>)<sub>2</sub>:Dy<sup>3+</sup>/Eu<sup>3+</sup></b> |       |
|-------------------|-----------------------------------------|-------|-------------------------------------------------------------------------|-------|
|                   | Wt %                                    | At %  | Wt %                                                                    | At %  |
| <b>Sodium</b>     | 1.55                                    | 2.98  | 1.95                                                                    | 5.08  |
| <b>Gadolinium</b> | 75.67                                   | 33.17 | 61.65                                                                   | 23.51 |
| <b>Tungstate</b>  | 6.26                                    | 2.37  | 3.53                                                                    | 1.15  |
| <b>Oxygen</b>     | 13.95                                   | 60.11 | 17.31                                                                   | 64.91 |
| <b>Dysprosium</b> | -                                       | -     | 6.32                                                                    | 2.33  |
| <b>Europium</b>   | -                                       | -     | 7.53                                                                    | 3.68  |
